# Supplementary material for: Selective porous gates made from colloidal silica nanoparticles
Source: Beilstein J Nanotechnol. 2015 Nov 4;6:2105–12. doi: 10.3762/bjnano.6.215 (PMC4660950; doi:10.3762/bjnano.6.215)
Supplement: File 1 — External calibration curves performed by UV–vis spectroscopy. [file Beilstein_J_Nanotechnol-06-2105-s001.pdf]

**Supporting Information**

**for**

**Selective porous gates made from colloidal silica nanoparticles**

Roberto Nisticò<sup>\*1</sup>, Paola Avetta<sup>1</sup>, Paola Calza<sup>1,2</sup>, Debora Fabbri<sup>1</sup>, Giuliana Magnacca<sup>1,2</sup> and Dominique Scalarone<sup>1,2</sup>

Address: <sup>1</sup>University of Torino, Department of Chemistry, Via P. Giuria 7, 10125 Torino, Italy and <sup>2</sup>NIS Research Centre, Via P. Giuria 7, 10125 Torino, Italy

Email: Roberto Nisticò - roberto.nistico@unito.it

\* Corresponding author

## Supporting Information

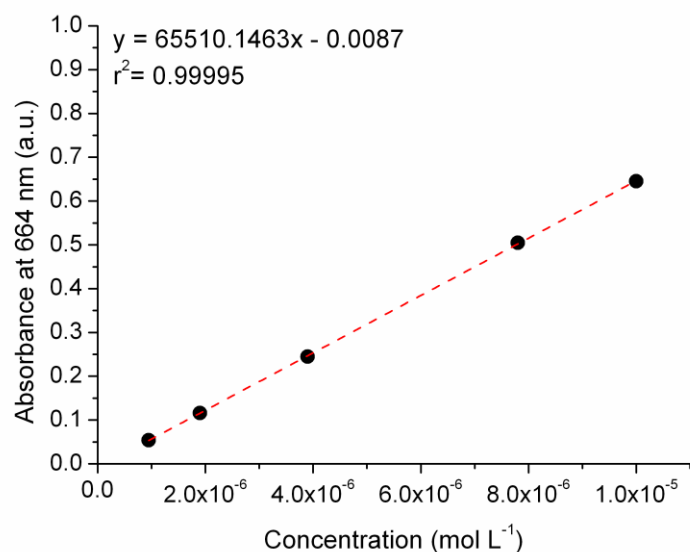

**Figure S1:** Calibration curve of MB determined at 664 nm: Absorbance as a function of MB concentration. Reliability of regressions:  $R^2 = 0.99995$ .

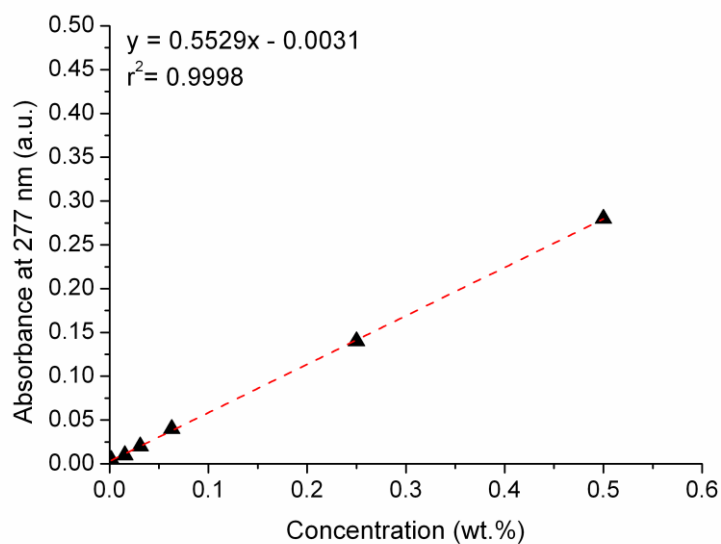

**Figure S2:** Calibration curve of RNase determined at 277 nm: Absorbance as a function of RNase concentration. Reliability of regressions:  $R^2 = 0.9998$ .
